# Supplementary material for: A metal–organic framework-derived pseudocapacitive titanium oxide/carbon core/shell heterostructure for high performance potassium ion hybrid capacitors
Source: Royal Society of Chemistry journal article supplement (doi:10.1039/d0ta04912c), 2020-01-01
Supplement: d0ta04912c1.pdf [file d0ta04912c1.pdf]

## Electronic Supplementary Information

### **Metal-Organic Framework-Derived Pseudocapacitive Titanium Oxide/Carbon Core/Shell Heterostructure for High Performance Potassium Ion Hybrid Capacitor**

Hongxia Li,<sup>a,b,c</sup> Jiangtao Chen,<sup>a</sup> Li Zhang,<sup>a</sup> Kunjie Wang,<sup>c</sup> Xu Zhang,<sup>a</sup> Bingjun Yang,<sup>a,b</sup> Lingyang Liu,<sup>a,b</sup> Weisheng Liu,<sup>d</sup> Xingbin Yan<sup>\*,a,b,e</sup>

<sup>a</sup> Laboratory of Clean Energy Chemistry and Materials, State Key Laboratory of Solid Lubrication, Lanzhou Institute of Chemical Physics, Chinese Academy of Sciences, Lanzhou 730000, China

<sup>b</sup> Center of Materials Science and Optoelectronics Engineering, University of Chinese Academy of Sciences, Beijing 100049, China

<sup>c</sup> School of Petrochemical Engineering, Lanzhou University of Technology, Lanzhou 730050, P. R. China

<sup>d</sup> College of Chemistry and Chemical Engineering, Lanzhou University, Lanzhou 730000, P. R. China.

<sup>e</sup> Dalian National Laboratory for Clean Energy, Chinese Academy of Sciences, Dalian 116000, China

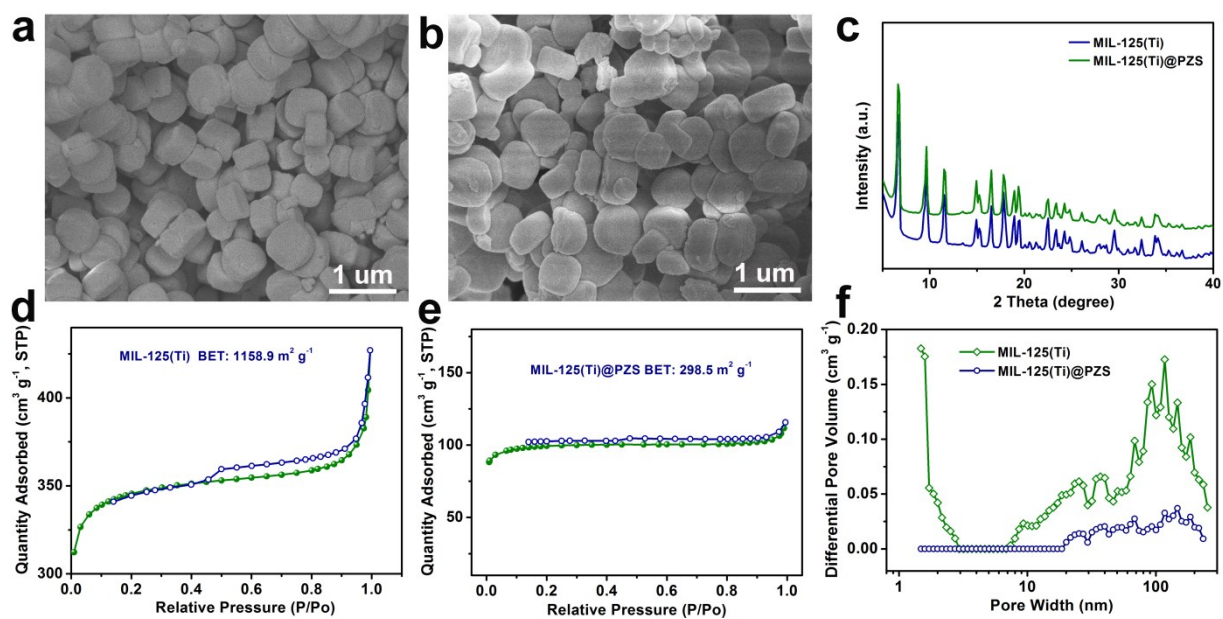

**Fig. S1.** Morphology and structure characterization: (a) SEM image of MIL-125 (Ti), (b) SEM image of MIL-125 (Ti)@PZS, (c) XRD patterns of MIL-125 (Ti) and MIL-125 (Ti)@PZS. Nitrogen absorption/desorption isotherm curves of (d) MIL-125 (Ti), (e) MIL-125 (Ti)@PZS. (f) The corresponding pore size distribution curves.

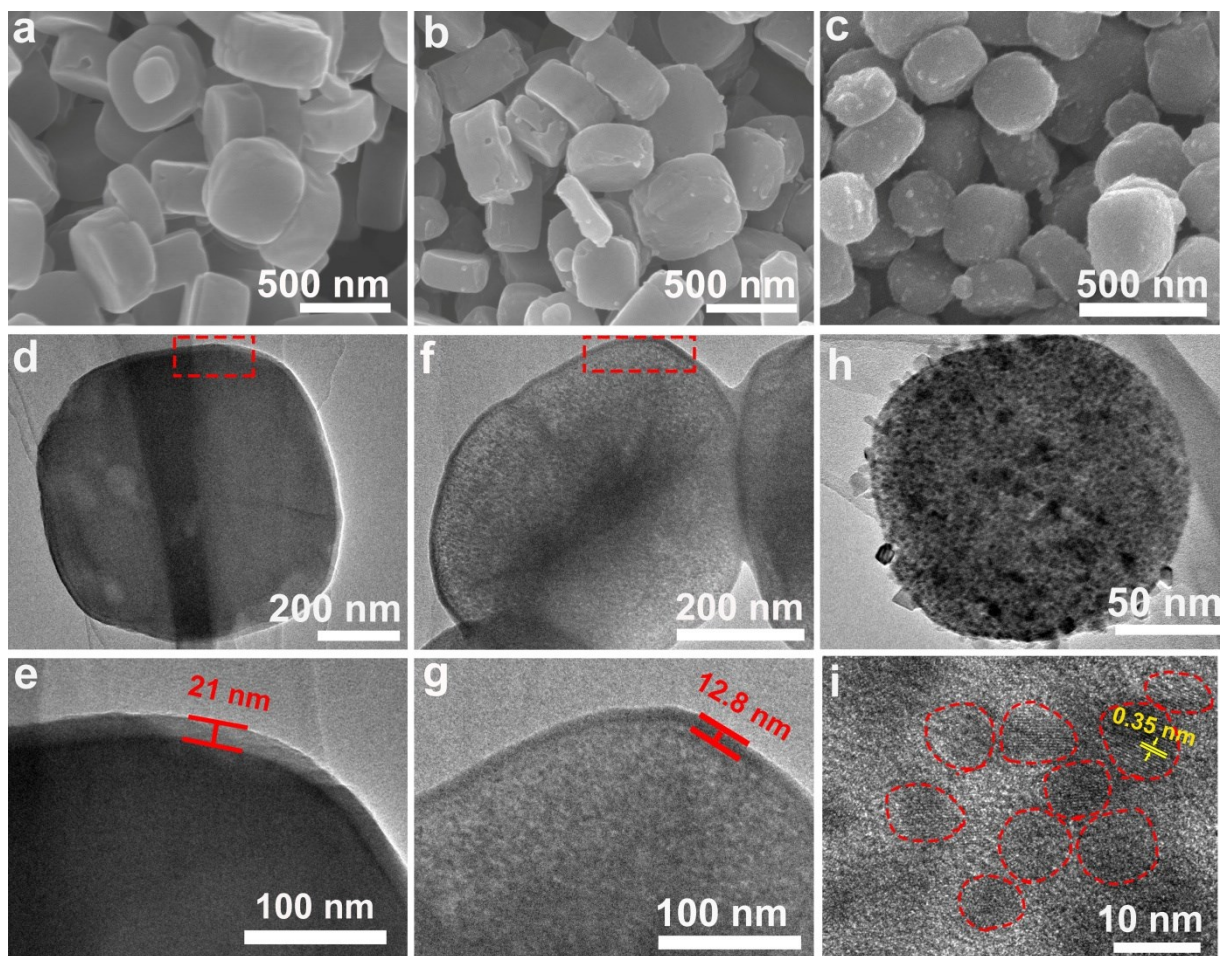

**Fig. S2** Morphology characterization: SEM images of (a)  $\text{TiO}_2/\text{C}@\text{NPSC-600}$ , (b)  $\text{TiO}_2/\text{C}@\text{NPSC-800}$  and (c)  $\text{TiO}_2/\text{C-700}$ . TEM images of (d, e) MIL-125(Ti)@PZS, (f, g, i)  $\text{TiO}_2/\text{C}@\text{NPSC-700}$  and (h)  $\text{TiO}_2/\text{C-700}$ .

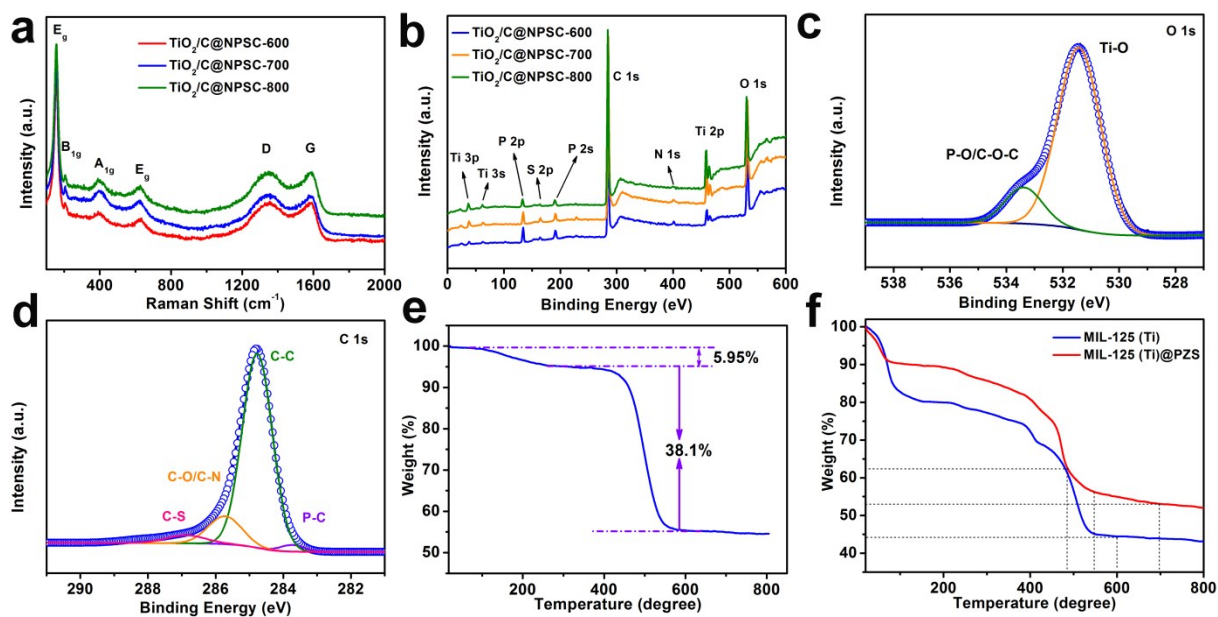

**Fig. S3** (a) Raman spectra and (b) XPS full surveys of  $\text{TiO}_2/\text{C}@NPSC-x$ . (c) O 1s spectra, (d) C 1s spectra, (e) TG curve of  $\text{TiO}_2/\text{C}@NPSC-700$  in air. (f) TG curves of MIL-125 (Ti)@PZS and MIL-125 (Ti) tested in  $\text{N}_2$  atmosphere (as shown in TG curves, before 500 °C, the weight loss trends were similar in both MIL-125 (Ti) and MIL-125 (Ti)@PZS because only the decomposition of MOFs precursor was occurred. In comparison, the PZS layer decomposition resulted in the discrepancy of TG curves between MIL-125 (Ti)@PZS and MIL-125 (Ti) when the annealing temperature was higher than 500 °C).

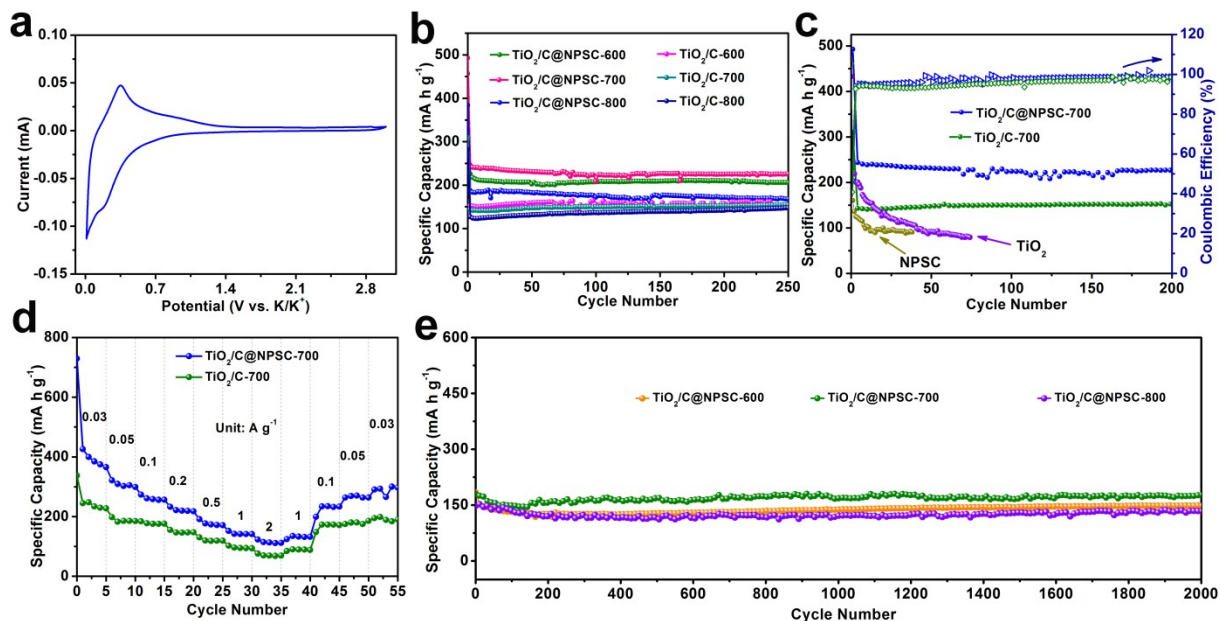

**Fig. S4** (a) CV curve of acetylene carbon black at scan rate of 0.1 mV s<sup>-1</sup>. (b) The cycling performance of TiO<sub>2</sub>/C@NPSC-x compared with TiO<sub>2</sub>/C-x (prepared by pyrolysis of MIL-125 (Ti)) at 0.1 A g<sup>-1</sup>. (c) The comparison of electrochemical performance of TiO<sub>2</sub>/C@NPSC-700, TiO<sub>2</sub>/C-700, anatase TiO<sub>2</sub> and NPSC at 0.1 A g<sup>-1</sup>, in where, TiO<sub>2</sub> was prepared by pyrolyzing of TiO<sub>2</sub>/C@NPSC-700 at 500 °C in air, NPSC (N, P, S-doped carbon) was derived from pyrolysis of PZS polymer. (d) rate capability at different current densities ranging from 0.03 to 2 A g<sup>-1</sup> of TiO<sub>2</sub>/C@NPSC-700 and TiO<sub>2</sub>/C-700. (e) The cycling performance of TiO<sub>2</sub>/C@NPSC-x at 0.5 A g<sup>-1</sup>.

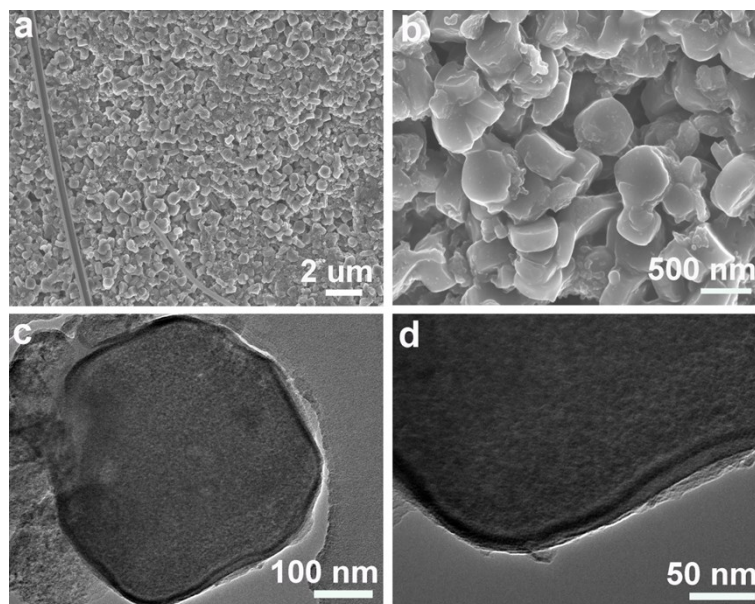

**Fig. S5** Morphology characterization of TiO<sub>2</sub>/C@NPSC-700 electrode after 2000 cycles at 1 A g<sup>-1</sup>: (a, b) SEM images, (c, d) TEM images.

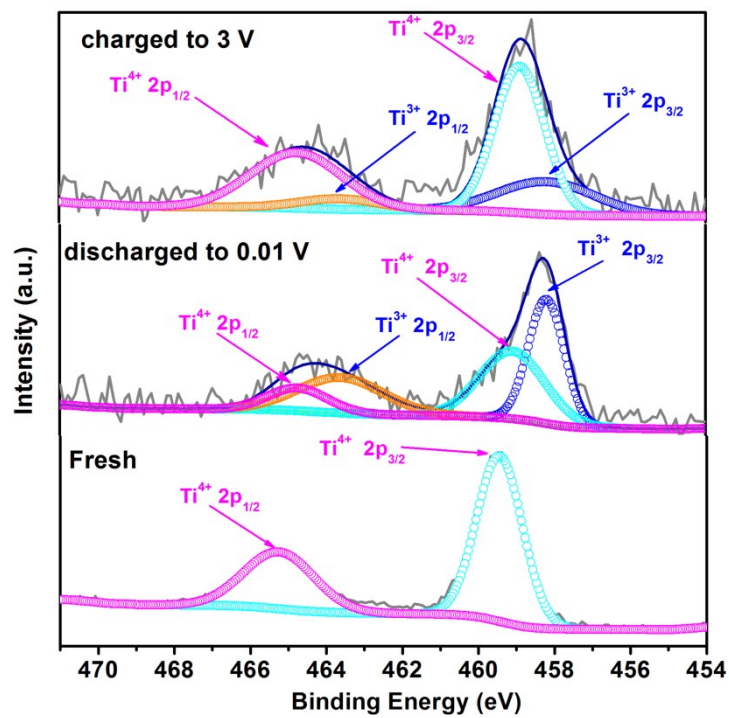

**Fig. S6** Ti 2p spectra of  $\text{TiO}_2/\text{C}@\text{NPSC-700}$  electrode at different charge/discharge states.

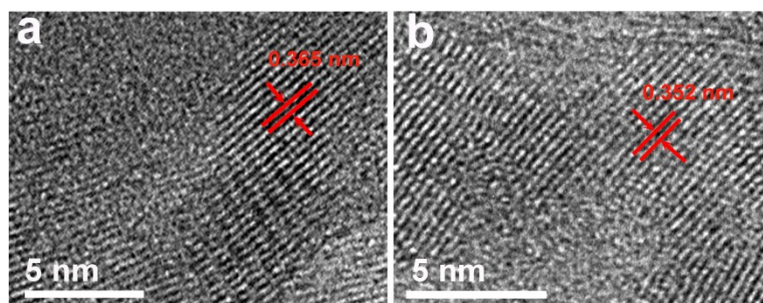

**Fig. S7** HRTEM images of  $\text{TiO}_2/\text{C}@\text{NPSC-700}$  electrode: (a) discharged to 0.01 V, (b) charged to 3 V.

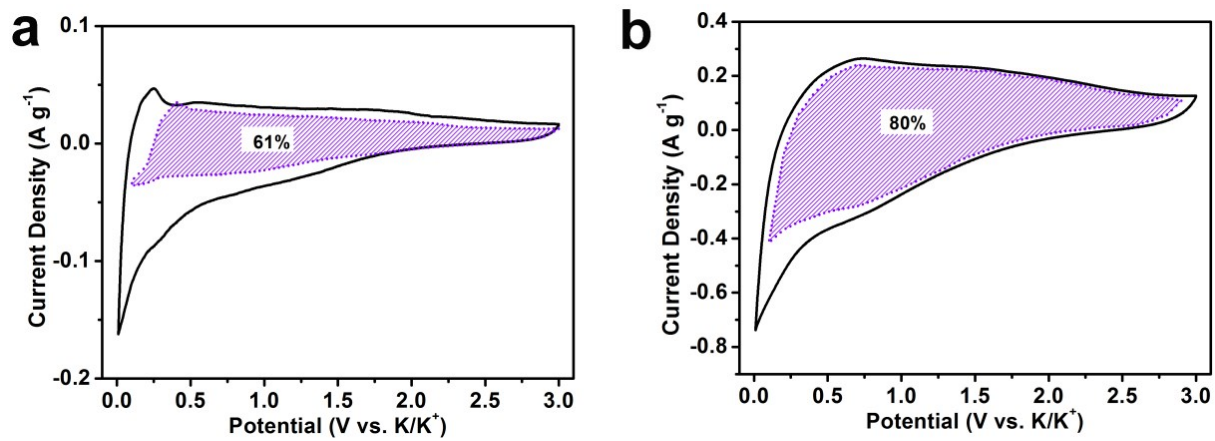

**Fig. S8** The capacitive contribution at scan rate of (a)  $0.1 \text{ mV s}^{-1}$  and (b)  $1 \text{ mV s}^{-1}$ .

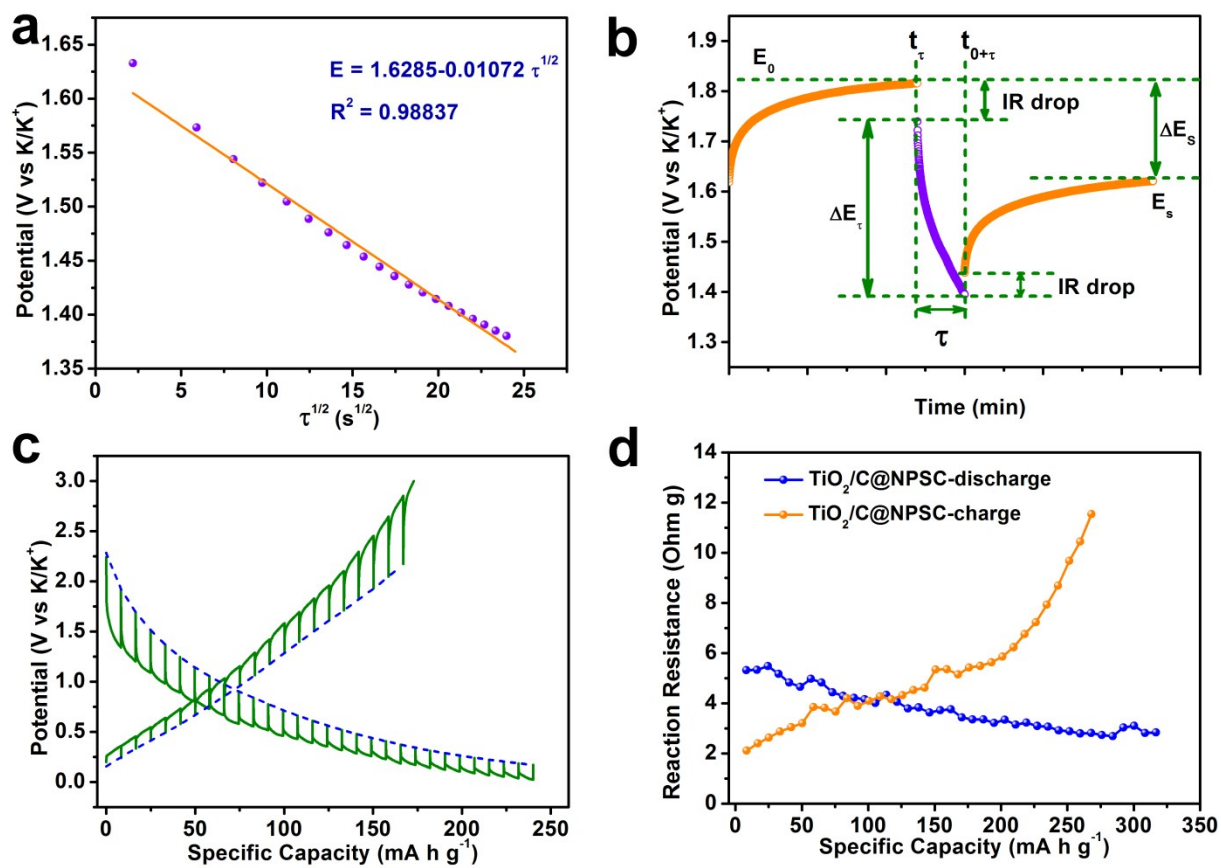

**Fig. S9** (a) Variation of cell voltage during single titration plotted against  $\tau^{1/2}$  for TiO<sub>2</sub>/C@NPSC-700 anode, (b) Scheme for voltage response with time during a single constant current pulse. (c) GITT curves of TiO<sub>2</sub>/C-700, (d) reaction resistance of TiO<sub>2</sub>/C@NPSC-700 anode during GITT measurement.



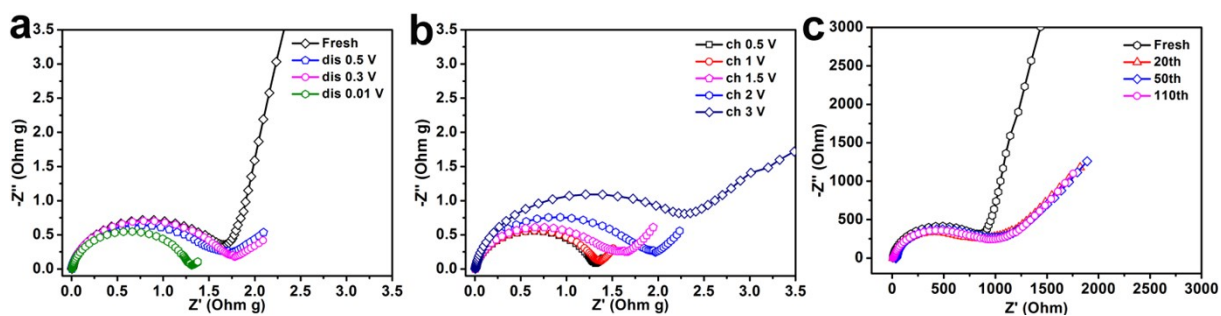

**Fig. S10** EIS spectra of  $\text{TiO}_2/\text{C}@\text{NPSC-700}$  anode at (a) different discharge states, (b) different charge states and (c) different cycles.

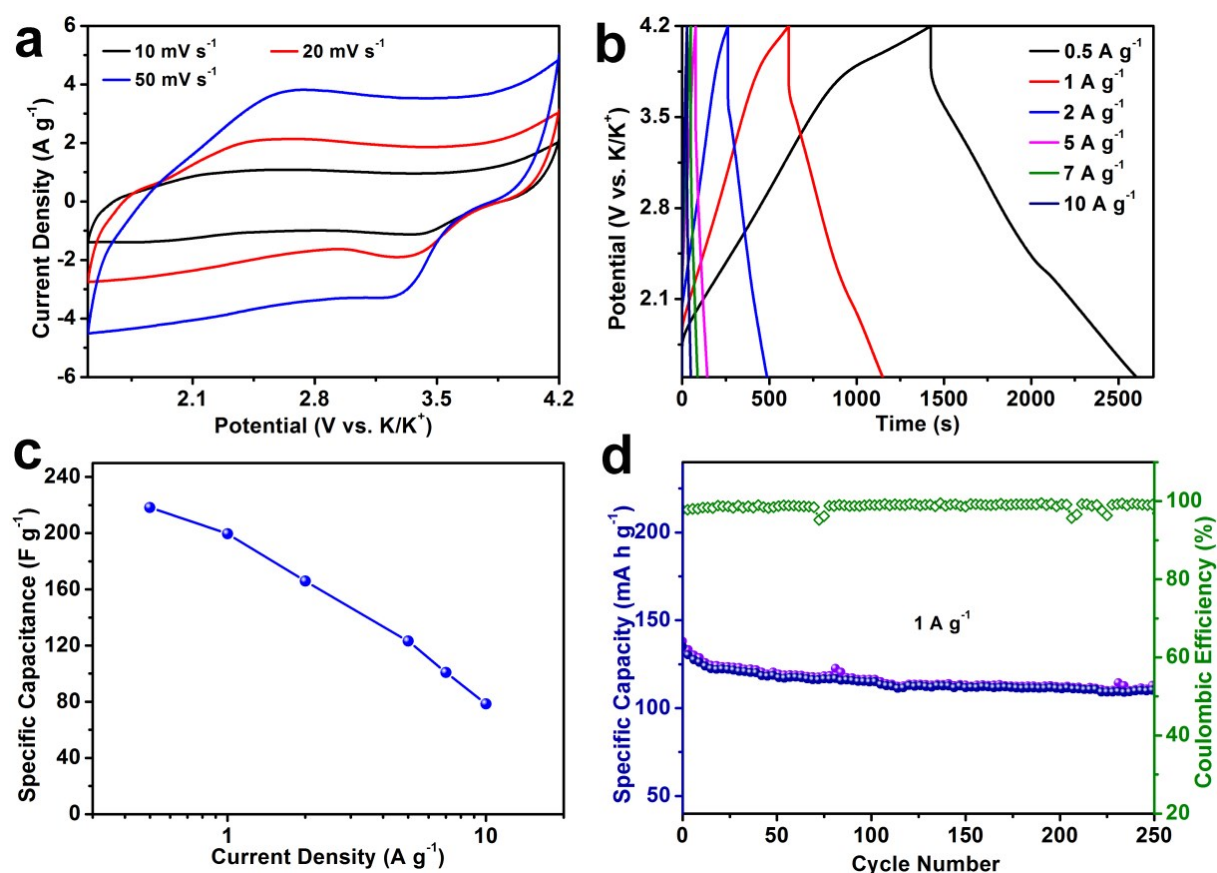

**Fig. S11** Electrochemical performance of ZDPC electrode: (a) CV curves at different scan rates ranging from 10 to 50  $\text{mV s}^{-1}$  under 1.5-4.2 V versus  $\text{K}/\text{K}^+$ , (b) GCD curves under different current densities ranging from 0.5 to 10  $\text{A g}^{-1}$ , (c) the rate capability, and (d) the cycling performance and CE for 300 cycles at 1  $\text{A g}^{-1}$ .

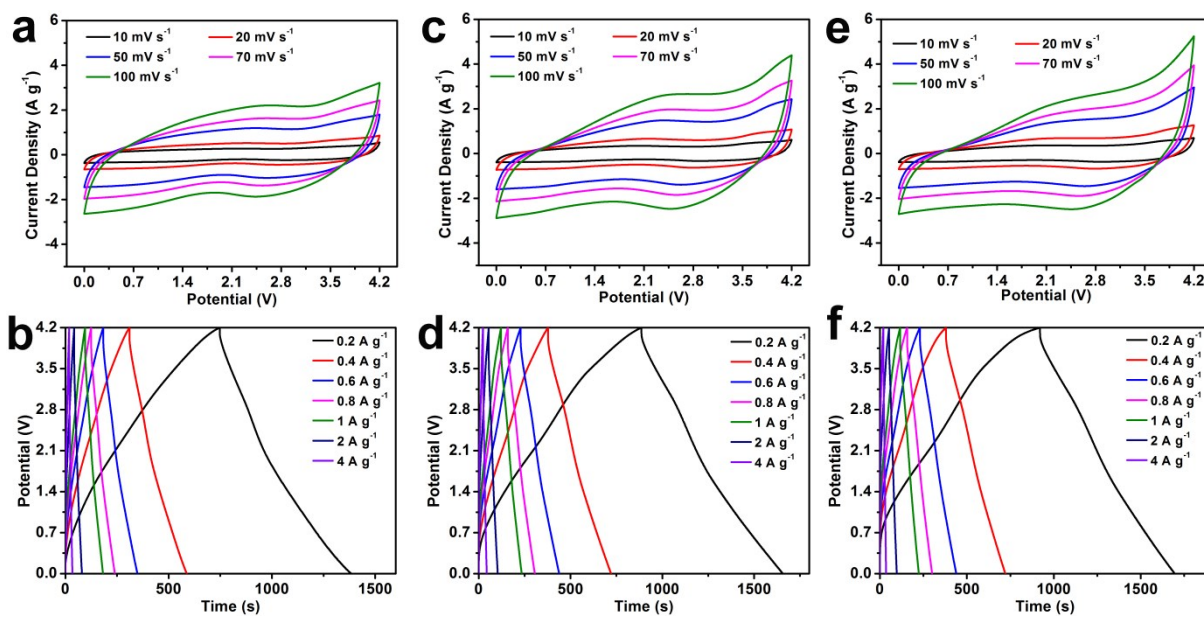

**Fig. S12** Electrochemical performance of as-assembled PIHCs with different mass ratios of anode to cathode: (a) CV curves and (b) GCD profiles of PIHC with the mass ratio of 2:1; (c) CV curves and (d) GCD profiles of PIHC with the mass ratio of 1:1; (e) CV curves and (f) GCD profiles of PIHC with the mass ratio of 1:1.5.

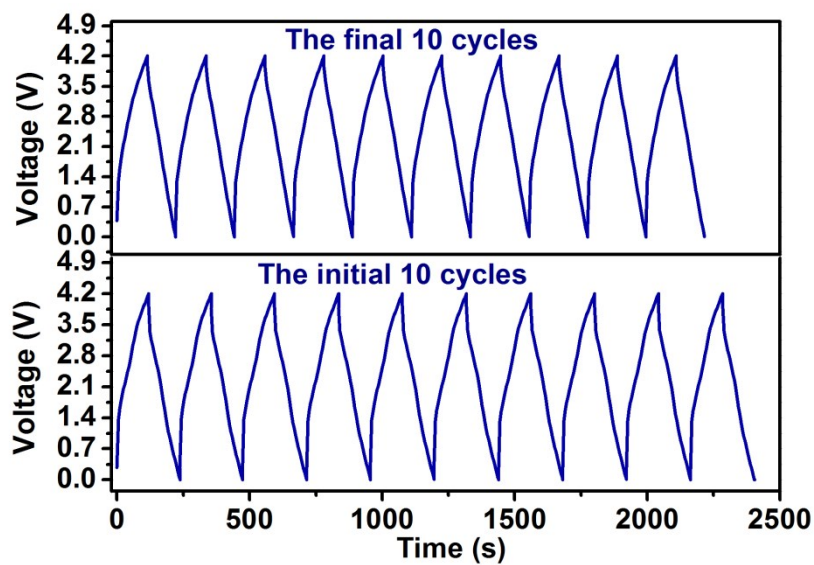

**Fig. S13** The GCD profiles of the initial 10 cycles and the final 10 cycles.

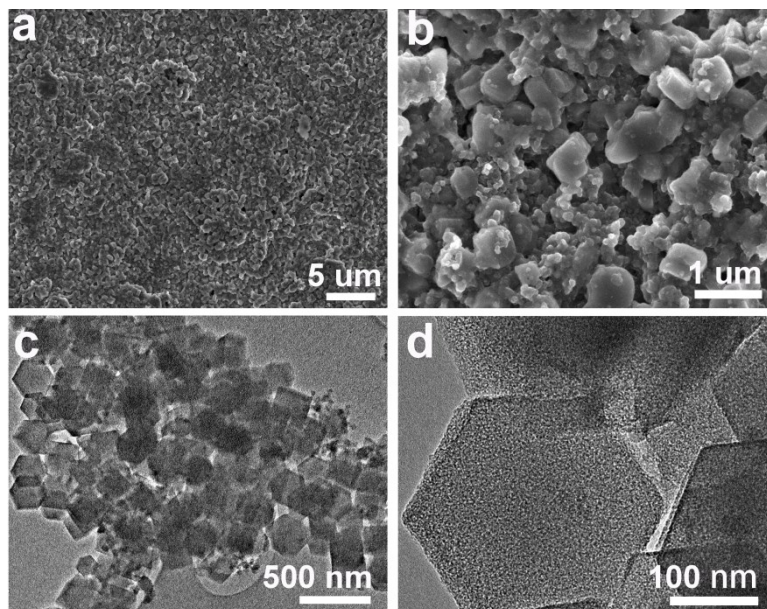

**Fig. S14** (a-b) SEM images of  $\text{TiO}_2/\text{C}@\text{NPSC-700}$  anode after 10 000 cycles in full-cell. (c-d) TEM images of ZDPC cathode after 10 000 cycles in full-cell.

**Table S1.** Physicochemical properties of different samples.

| <b>Samples</b>               | <b>S<sub>BET</sub><br/>(m<sup>2</sup> g<sup>-1</sup>)</b> | <b>Pore volume<br/>(cm<sup>3</sup> g<sup>-1</sup>)</b> | <b>Pore size distribution<br/>(nm)</b> | <b>crystalline phases</b> |
|------------------------------|-----------------------------------------------------------|--------------------------------------------------------|----------------------------------------|---------------------------|
| MIL-125 (Ti)                 | 1158.9                                                    | 0.592                                                  | 1.48-2.73, 7.40-252.57                 |                           |
| MIL-125 (Ti)@PZS             | 298.5                                                     | 0.173                                                  | 20.07-233.91                           |                           |
| TiO <sub>2</sub> /C-700      | 275.8                                                     | 0.171                                                  | 1.48-5.04, 12.65-252.57                | anatase                   |
| TiO <sub>2</sub> /C@NPSC-600 | 51.7                                                      | 0.041                                                  | 1.48-2.73                              | anatase                   |
| TiO <sub>2</sub> /C@NPSC-700 | 170.4                                                     | 0.149                                                  | 1.48-18.58                             | anatase                   |
| TiO <sub>2</sub> /C@NPSC-800 | 274.5                                                     | 0.212                                                  | 1.48-11.72                             | anatase                   |

**Table S2.** Composition data obtained from XPS investigation for the TiO<sub>2</sub>/C@NPSC-x samples.

| Samples                      | Element content (at%) |      |       |      |      |      |
|------------------------------|-----------------------|------|-------|------|------|------|
|                              | C                     | N    | O     | P    | S    | Ti   |
| TiO <sub>2</sub> /C@NPSC-600 | 69.95                 | 1.82 | 18.89 | 6.55 | 1.02 | 1.77 |
| TiO <sub>2</sub> /C@NPSC-700 | 73.63                 | 1.63 | 16.38 | 4.42 | 1.15 | 2.79 |
| TiO <sub>2</sub> /C@NPSC-800 | 77.55                 | 1    | 14.56 | 3.12 | 0.55 | 3.22 |

**Table S3.** Comparison of the electrochemical performances of the as-prepared TiO<sub>2</sub>/C@NPSC-700 anode with other anode materials for PIBs reported previously.

| Electrode                                       | Rate Capability<br>(mA h g <sup>-1</sup> )/(A g <sup>-1</sup> ) | Capacity Retention<br>(%/cycles/current density)                            | ICE   |
|-------------------------------------------------|-----------------------------------------------------------------|-----------------------------------------------------------------------------|-------|
| TiO <sub>2</sub> /C@NPSC<br>(this work)         | 309.5 mA h g <sup>-1</sup> /0.05 A g <sup>-1</sup>              | 85%/5000 cycles/1 A g <sup>-1</sup>                                         | 46.9% |
|                                                 | 261 mA h g <sup>-1</sup> /0.1 A g <sup>-1</sup>                 |                                                                             |       |
|                                                 | 221.8 mA h g <sup>-1</sup> /0.2 A g <sup>-1</sup>               |                                                                             |       |
|                                                 | 177.3 mA h g <sup>-1</sup> /0.5 A g <sup>-1</sup>               |                                                                             |       |
|                                                 | 142.4 mA h g <sup>-1</sup> /1 A g <sup>-1</sup>                 |                                                                             |       |
|                                                 | 114.3 mA h g <sup>-1</sup> /2 A g <sup>-1</sup>                 |                                                                             |       |
| VSe <sub>2</sub> nanosheets <sup>1</sup>        | 374 mA h g <sup>-1</sup> /0.1 A g <sup>-1</sup>                 | 87.3%/500 cycles/2 A g <sup>-1</sup>                                        | 69.1% |
|                                                 | 350 mA h g <sup>-1</sup> /0.2 A g <sup>-1</sup>                 |                                                                             |       |
|                                                 | 334 mA h g <sup>-1</sup> /0.5 A g <sup>-1</sup>                 |                                                                             |       |
|                                                 | 269 mA h g <sup>-1</sup> /1 A g <sup>-1</sup>                   |                                                                             |       |
|                                                 | 172 mA h g <sup>-1</sup> /2 A g <sup>-1</sup>                   |                                                                             |       |
| VS <sub>2</sub> <sup>2</sup>                    | 380 mA h g <sup>-1</sup> /0.1 A g <sup>-1</sup>                 | No decay/100 cycles/0.5 A g <sup>-1</sup>                                   | —     |
|                                                 | 250 mA h g <sup>-1</sup> /1 A g <sup>-1</sup>                   |                                                                             |       |
|                                                 | 100 mA h g <sup>-1</sup> /2 A g <sup>-1</sup>                   |                                                                             |       |
| TiO <sub>2</sub> /RGO <sup>3</sup>              | 354.3 mA h g <sup>-1</sup> /0.05 A g <sup>-1</sup>              | 78%/200 cycles/0.2 A g <sup>-1</sup><br>85%/1000 cycles/1 A g <sup>-1</sup> | 35%   |
|                                                 | 282.2 mA h g <sup>-1</sup> /0.1 A g <sup>-1</sup>               |                                                                             |       |
|                                                 | 220.9 mA h g <sup>-1</sup> /0.2 A g <sup>-1</sup>               |                                                                             |       |
|                                                 | 151.7 mA h g <sup>-1</sup> /0.5 A g <sup>-1</sup>               |                                                                             |       |
|                                                 | 107.1 mA h g <sup>-1</sup> /1 A g <sup>-1</sup>                 |                                                                             |       |
| TiO <sub>x</sub> N <sub>y</sub> /C <sup>4</sup> | 127 mA h g <sup>-1</sup> /0.2 A g <sup>-1</sup>                 | -/1250 cycles/0.2 A g <sup>-1</sup>                                         | —     |
|                                                 | 102 mA h g <sup>-1</sup> /0.4 A g <sup>-1</sup>                 |                                                                             |       |
|                                                 | 84 mA h g <sup>-1</sup> /0.8 A g <sup>-1</sup>                  |                                                                             |       |
|                                                 | 72 mA h g <sup>-1</sup> /1.6 A g <sup>-1</sup>                  |                                                                             |       |
| PMC (MoSe <sub>2</sub> /C) <sup>5</sup>         | 382 mA h g <sup>-1</sup> /0.2 A g <sup>-1</sup>                 | 83.5%/1000 cycles/1 A g <sup>-1</sup>                                       | 63.4% |
|                                                 | 342 mA h g <sup>-1</sup> /0.4 A g <sup>-1</sup>                 |                                                                             |       |
|                                                 | 304 mA h g <sup>-1</sup> /0.6 A g <sup>-1</sup>                 |                                                                             |       |
|                                                 | 277 mA h g <sup>-1</sup> /0.8 A g <sup>-1</sup>                 |                                                                             |       |
|                                                 | 254 mA h g <sup>-1</sup> /1 A g <sup>-1</sup>                   |                                                                             |       |
| CoP@NPPCS <sup>6</sup>                          | 224 mA h g <sup>-1</sup> /2 A g <sup>-1</sup>                   | 114 mA h g <sup>-1</sup> /1000 cycles/0.5 A g <sup>-1</sup>                 | 19.6% |
|                                                 | 174 mA h g <sup>-1</sup> /0.05 A g <sup>-1</sup>                |                                                                             |       |
|                                                 | 134 mA h g <sup>-1</sup> /0.1 A g <sup>-1</sup>                 |                                                                             |       |
|                                                 | 123 mA h g <sup>-1</sup> /0.2 A g <sup>-1</sup>                 |                                                                             |       |
|                                                 | 94 mA h g <sup>-1</sup> /0.5 A g <sup>-1</sup>                  |                                                                             |       |
|                                                 | 74 mA h g <sup>-1</sup> /1 A g <sup>-1</sup>                    |                                                                             |       |
| 54 mA h g <sup>-1</sup> /2 A g <sup>-1</sup>    |                                                                 |                                                                             |       |

|                                                     |                                                     |                                                           |       |
|-----------------------------------------------------|-----------------------------------------------------|-----------------------------------------------------------|-------|
| CoS@G <sup>7</sup>                                  | 530 mA h g <sup>-1</sup> /0.1 A g <sup>-1</sup>     | 70.2%/100 cycles/0.5 A g <sup>-1</sup>                    | 64.4% |
|                                                     | 414 mA h g <sup>-1</sup> /0.5 A g <sup>-1</sup>     |                                                           |       |
|                                                     | 365 mA h g <sup>-1</sup> /1 A g <sup>-1</sup>       |                                                           |       |
|                                                     | 310 mA h g <sup>-1</sup> /2 A g <sup>-1</sup>       |                                                           |       |
|                                                     | 278 mA h g <sup>-1</sup> /3 A g <sup>-1</sup>       |                                                           |       |
|                                                     | 232 mA h g <sup>-1</sup> /4 A g <sup>-1</sup>       |                                                           |       |
| V <sub>2</sub> O <sub>3</sub> @PNCNFs <sup>8</sup>  | 240 mA h g <sup>-1</sup> /0.05 A g <sup>-1</sup>    | 95.8%/500 cycles/0.05 A g <sup>-1</sup>                   | 60.3% |
|                                                     | 218 mA h g <sup>-1</sup> /0.1 A g <sup>-1</sup>     |                                                           |       |
|                                                     | 209 mA h g <sup>-1</sup> /0.2 A g <sup>-1</sup>     |                                                           |       |
|                                                     | 193 mA h g <sup>-1</sup> /0.3 A g <sup>-1</sup>     |                                                           |       |
|                                                     | 166 mA h g <sup>-1</sup> /0.5 A g <sup>-1</sup>     |                                                           |       |
|                                                     | 134 mA h g <sup>-1</sup> /1 A g <sup>-1</sup>       |                                                           |       |
| KTO/rGO <sup>9</sup>                                | 228 mA h g <sup>-1</sup> /0.1 A g <sup>-1</sup>     | —/700 cycles /2 A g <sup>-1</sup>                         | 24%   |
|                                                     | 162 mA h g <sup>-1</sup> /0.2 A g <sup>-1</sup>     |                                                           |       |
|                                                     | 116 mA h g <sup>-1</sup> /0.5 A g <sup>-1</sup>     |                                                           |       |
|                                                     | 84 mA h g <sup>-1</sup> /1 A g <sup>-1</sup>        |                                                           |       |
|                                                     | 75 mA h g <sup>-1</sup> /2 A g <sup>-1</sup>        |                                                           |       |
| M-KTO <sup>10</sup>                                 | 105 mA h g <sup>-1</sup> /0.1 A g <sup>-1</sup>     | 51%/900 cycles/0.2 A g <sup>-1</sup>                      | 25.9% |
|                                                     | 81 mA h g <sup>-1</sup> /0.3 A g <sup>-1</sup>      |                                                           |       |
| a-Ti <sub>3</sub> C <sub>2</sub> MNRs <sup>11</sup> | 141 mA h g <sup>-1</sup> /0.02 A g <sup>-1</sup>    | 42 mA h g <sup>-1</sup> /500 cycles/0.2 A g <sup>-1</sup> | 27%   |
|                                                     | 101 mA h g <sup>-1</sup> /0.05 A g <sup>-1</sup>    |                                                           |       |
|                                                     | 86 mA h g <sup>-1</sup> /0.1 A g <sup>-1</sup>      |                                                           |       |
|                                                     | 77 mA h g <sup>-1</sup> /0.15 A g <sup>-1</sup>     |                                                           |       |
|                                                     | 70 mA h g <sup>-1</sup> /0.2 A g <sup>-1</sup>      |                                                           |       |
|                                                     | 60 mA h g <sup>-1</sup> /0.3 A g <sup>-1</sup>      |                                                           |       |
| HNTO/CS <sup>12</sup>                               | 138.3 mA h g <sup>-1</sup> /0.05 A g <sup>-1</sup>  | 82.5%/1555 cycles /0.1 A g <sup>-1</sup>                  | —     |
|                                                     | 127.9 mA h g <sup>-1</sup> /0.1 A g <sup>-1</sup>   |                                                           |       |
|                                                     | 48.7 mA h g <sup>-1</sup> /0.5 A g <sup>-1</sup>    |                                                           |       |
| N-doped carbon nanofibers <sup>13</sup>             | 238 mA h g <sup>-1</sup> /0.1 A g <sup>-1</sup>     | 146 mA h g <sup>-1</sup> /4000 cycles/2 A g <sup>-1</sup> | 49%   |
|                                                     | 217 mA h g <sup>-1</sup> /0.2 A g <sup>-1</sup>     |                                                           |       |
|                                                     | 192 mA h g <sup>-1</sup> /0.5 A g <sup>-1</sup>     |                                                           |       |
|                                                     | 172 mA h g <sup>-1</sup> /1 A g <sup>-1</sup>       |                                                           |       |
|                                                     | 153 mA h g <sup>-1</sup> /2 A g <sup>-1</sup>       |                                                           |       |
|                                                     | 126 mA h g <sup>-1</sup> /5 A g <sup>-1</sup>       |                                                           |       |
|                                                     | 104 mA h g <sup>-1</sup> /10 A g <sup>-1</sup>      |                                                           |       |
| 101 mA h g <sup>-1</sup> /20 A g <sup>-1</sup>      |                                                     |                                                           |       |
| HINCA <sup>14</sup>                                 | 342.8 mA h g <sup>-1</sup> /0.028 A g <sup>-1</sup> | 0.05% decay/per cycle/500 cycles/0.14 A g <sup>-1</sup>   | 72.1% |
|                                                     | 302.8 mA h g <sup>-1</sup> /0.056 A g <sup>-1</sup> |                                                           |       |
|                                                     | 251.4 mA h g <sup>-1</sup> /0.14 A g <sup>-1</sup>  |                                                           |       |
|                                                     | 200 mA h g <sup>-1</sup> /0.28 A g <sup>-1</sup>    |                                                           |       |
|                                                     | 114.3 mA h g <sup>-1</sup> /0.56 A g <sup>-1</sup>  |                                                           |       |

---

|                    |                                                  |                                                         |   |
|--------------------|--------------------------------------------------|---------------------------------------------------------|---|
|                    | 240 mA h g <sup>-1</sup> /0.05 A g <sup>-1</sup> |                                                         |   |
|                    | 236 mA h g <sup>-1</sup> /0.08 A g <sup>-1</sup> |                                                         |   |
| CNFF <sup>15</sup> | 214 mA h g <sup>-1</sup> /0.1 A g <sup>-1</sup>  | 0.006% decay/per cycle/2000 cycles /1 A g <sup>-1</sup> | — |
|                    | 202 mA h g <sup>-1</sup> /0.2 A g <sup>-1</sup>  |                                                         |   |
|                    | 181 mA h g <sup>-1</sup> /0.5 A g <sup>-1</sup>  |                                                         |   |
|                    | 164 mA h g <sup>-1</sup> /1 A g <sup>-1</sup>    |                                                         |   |

---



**Table S4.** Electrochemical performance comparison of as-assembled TiO<sub>2</sub>/C@NPSC//ZDPC PIHC with other PIHC, SIHCs and LIHCs reported early.

| System                                               | Energy density/Power density                         | Potential Window (V) | Capacity Retention/current density/Cycling life |
|------------------------------------------------------|------------------------------------------------------|----------------------|-------------------------------------------------|
| <b>PIHCs</b>                                         |                                                      |                      |                                                 |
| Our work                                             | 114 W h kg <sup>-1</sup> /210 W kg <sup>-1</sup>     | 0-4.2                | 91.6%/1 A g <sup>-1</sup> /10 000 cycles        |
|                                                      | 37.3 W h kg <sup>-1</sup> /21 kW kg <sup>-1</sup>    |                      |                                                 |
| CTP@//AC <sup>16</sup>                               | 80 W h kg <sup>-1</sup> /32 W kg <sup>-1</sup>       | 1-4                  | 75.9%/5 A g <sup>-1</sup> /4000 cycles          |
|                                                      | 34 W h kg <sup>-1</sup> /5.144 kW kg <sup>-1</sup>   |                      |                                                 |
| Soft carbon//AC <sup>17</sup>                        | 120 W h kg <sup>-1</sup> /96 W kg <sup>-1</sup>      | 0-4                  | 97.5%/0.75 A g <sup>-1</sup> /1500 cycles       |
|                                                      | 4.32 W h kg <sup>-1</sup> /0.536 kW kg <sup>-1</sup> |                      |                                                 |
| KTO//NGC <sup>18</sup>                               | 58.2 W h kg <sup>-1</sup> /160 W kg <sup>-1</sup>    | 0-3.5                | 75.5%/1 A g <sup>-1</sup> /5000 cycles          |
|                                                      | 11.8 W h kg <sup>-1</sup> /7.2 kW kg <sup>-1</sup>   |                      |                                                 |
| CO <sub>2</sub> P@rGO//AC <sup>19</sup>              | 87 W h kg <sup>-1</sup> /12 W kg <sup>-1</sup>       | 1-4                  | 68%/1 A g <sup>-1</sup> /1000 cycles            |
|                                                      | 10 W h kg <sup>-1</sup> /4.2647 kW kg <sup>-1</sup>  |                      |                                                 |
| NHCS//ANHCS <sup>20</sup>                            | 114.2 W h kg <sup>-1</sup> /100.5 W kg <sup>-1</sup> | 0.01-4               | 93%/0.5 A g <sup>-1</sup> /2000 cycles          |
|                                                      | 19.1 W h kg <sup>-1</sup> /8.203 kW kg <sup>-1</sup> |                      | 80.4%/2 A g <sup>-1</sup> /5000 cycles          |
| S-N-PCNs//AC <sup>21</sup>                           | 187 W h kg <sup>-1</sup> /99 W kg <sup>-1</sup>      | 0-4                  | 86.4%/1 A g <sup>-1</sup> /3000 cycles          |
|                                                      | 76 W h kg <sup>-1</sup> /5.136 kW kg <sup>-1</sup>   |                      |                                                 |
| <b>SIHCs</b>                                         |                                                      |                      |                                                 |
| HP-CNWs//FM-CNSs <sup>22</sup>                       | 130.6 W h kg <sup>-1</sup> /210 W kg <sup>-1</sup>   | 0.5-4.2              | 85.4%/0.5 A g <sup>-1</sup> /3000 cycles        |
|                                                      | 43.6 W h kg <sup>-1</sup> /15.26 kW kg <sup>-1</sup> |                      |                                                 |
| MWTOG//AC <sup>23</sup>                              | 64.2 W h kg <sup>-1</sup> /56.3 W kg <sup>-1</sup>   | 1-3.8                | 90%/3.35 A g <sup>-1</sup> /10 000 cycles       |
|                                                      | 25.8 W h kg <sup>-1</sup> /1.357 kW kg <sup>-1</sup> |                      |                                                 |
| Gr-Nb <sub>2</sub> O <sub>5</sub> //AC <sup>24</sup> | 112.9 W h kg <sup>-1</sup> /80.1 W kg <sup>-1</sup>  | 1-4.3                | 97.1%/1 A g <sup>-1</sup> /1500 cycles          |
|                                                      | 62.2 W h kg <sup>-1</sup> /5.33 kW kg <sup>-1</sup>  |                      |                                                 |
| TiO <sub>2</sub> @CNT@C//BAC <sup>25</sup>           | 81.2 W h kg <sup>-1</sup> /126 W kg <sup>-1</sup>    | 1-4                  | 85.5%/1 A g <sup>-1</sup> /5000 cycles          |
|                                                      | 37.9 W h kg <sup>-1</sup> /12.4 kW kg <sup>-1</sup>  |                      |                                                 |
| N-TiO <sub>2</sub> //AC <sup>26</sup>                | 80.3 W h kg <sup>-1</sup> /500 W kg <sup>-1</sup>    | 1-4                  | 85%/1 A g <sup>-1</sup> /6500 cycles            |
|                                                      | 24.6 W h kg <sup>-1</sup> /12.5 kW kg <sup>-1</sup>  |                      |                                                 |
| PSNC//PSOC-A <sup>27</sup>                           | 201 W h kg <sup>-1</sup> /185 W kg <sup>-1</sup>     | 1.5-3.5              | 72%/6.4 A g <sup>-1</sup> /10 000 cycles        |
|                                                      | 50 W h kg <sup>-1</sup> /16.5 kW kg <sup>-1</sup>    |                      |                                                 |
| <b>LIHCs</b>                                         |                                                      |                      |                                                 |
| MoO <sub>2</sub> -CNT//AC <sup>28</sup>              | 70 W h kg <sup>-1</sup> /83 W kg <sup>-1</sup>       | 0.8-3.2 V            | 75%/1000 cycles/1 A g <sup>-1</sup>             |
|                                                      | 34 W h kg <sup>-1</sup> /4 kW kg <sup>-1</sup>       |                      |                                                 |

|                                                   |                                                      |         |                                       |
|---------------------------------------------------|------------------------------------------------------|---------|---------------------------------------|
| Co <sub>3</sub> ZnC@NC//MPC <sup>29</sup>         | 141.4 W h kg <sup>-1</sup> /275 W kg <sup>-1</sup>   | 1-4.5   | 80%/ 1 A g <sup>-1</sup> /1000 cycles |
|                                                   | 15.2 W h kg <sup>-1</sup> /10.3 kW kg <sup>-1</sup>  |         |                                       |
| Nb <sub>2</sub> O <sub>5</sub> //AC <sup>30</sup> | 95.55 W h kg <sup>-1</sup> /191 W kg <sup>-1</sup>   | 1-3.5 V | 83%/1000 cycles/2.2 A g <sup>-1</sup> |
|                                                   | 65.39 W h kg <sup>-1</sup> /5.35 kW kg <sup>-1</sup> |         |                                       |
| TiC//PHPNC <sup>31</sup>                          | 101.5 W h kg <sup>-1</sup> /450 W kg <sup>-1</sup>   | 0-4.5 V | 82%/5000 cycles/2 A g <sup>-1</sup>   |
|                                                   | 23.4 W h kg <sup>-1</sup> /67.5 kW kg <sup>-1</sup>  |         |                                       |

## References:

1. C. Yang, J. Feng, F. Lv, J. Zhou, C. Lin, K. Wang, Y. Zhang, Y. Yang, W. Wang, J. Li and S. Guo, *Adv. Mater.*, 2018, **30**, 1800036.
2. J. Zhou, L. Wang, M. Yang, J. Wu, F. Chen, W. Huang, N. Han, H. Ye, F. Zhao, Y. Li and Y. Li, *Adv. Mater.*, 2017, **29**, 1702061.
3. Y. Fang, R. Hu, B. Liu, Y. Zhang, K. Zhu, J. Yan, K. Ye, K. Cheng, G. Wang and D. Cao, *J. Mater. Chem. A*, 2019, **7**, 5363-5372.
4. M. Tao, G. Du, Y. Zhang, W. Gao, D. Liu, Y. Luo, J. Jiang, S. Bao and M. Xu, *Chem. Eng. J.*, 2019, **369**, 828-833.
5. W. Wang, B. Jiang, C. Qian, F. Lv, J. Feng, J. Zhou, K. Wang, C. Yang, Y. Yang and S. Guo, *Adv. Mater.*, 2018, **30**, 1801812.
6. J. Bai, B. Xi, H. Mao, Y. Lin, X. Ma, J. Feng and S. Xiong, *Adv. Mater.*, 2018, **30**, 1802310.
7. H. Gao, T. Zhou, Y. Zheng, Q. Zhang, Y. Liu, J. Chen, H. Liu and Z. Guo, *Adv. Funct. Mater.*, 2017, **27**, 1702634.
8. T. Jin, H. Li, Y. Li, L. Jiao and J. Chen, *Nano Energy*, 2018, **50**, 462-467.
9. C. Zeng, F. Xie, X. Yang, M. Jaroniec, L. Zhang and S. Qiao, *Angew. Chem., Int. Ed. Engl.* 2018, **57**, 8540-8544.
10. Y. Dong, Z. S. Wu, S. Zheng, X. Wang, J. Qin, S. Wang, X. Shi and X. Bao, *ACS Nano*, 2017, **11**, 4792-4800.
11. P. Lian, Y. Dong, Z.-S. Wu, S. Zheng, X. Wang, W. Sen, C. Sun, J. Qin, X. Shi and X. Bao, *Nano Energy*, 2017, **40**, 1-8.
12. P. Li, W. Wang, S. Gong, F. Lv, H. Huang, M. Luo, Y. Yang, C. Yang, J. Zhou, C. Qian, B. Wang, Q. Wang and S. Guo, *ACS Appl. Mater. interfaces*, 2018, **10**, 37974-37980.
13. Y. Xu, C. Zhang, M. Zhou, Q. Fu, C. Zhao, M. Wu and Y. Lei, *Nat. Commun.*, 2018, **9**, 1720.
14. D. S. Bin, X. J. Lin, Y. G. Sun, Y. S. Xu, K. Zhang, A. M. Cao and L. J. Wan, *J. Am. Chem. Soc.*, 2018, **140**, 7127-7134.
15. H. Li, Z. Cheng, Q. Zhang, A. Natan, Y. Yang, D. Cao and H. Zhu, *Nano Lett.*, 2018, **8**, 7407-7413.
16. Z. Zhang, M. Li, Y. Gao, Z. Wei, M. Zhang, C. Wang, Y. Zeng, B. Zou, G. Chen and F. Du, *Adv. Funct. Mater.*, 2018, **28**, 1802684.
17. L. Fan, K. Lin, J. Wang, R. Ma and B. Lu, *Adv. Mater.*, 2018, **30**, 1800804.
18. S. Dong, Z. Li, Z. Xing, X. Wu, X. Ji and X. Zhang, *ACS Appl. Mater. interfaces*, 2018, **10**, 15542-15547.
19. Y. Wang, Z. Zhang, G. Wang, X. Yang, Y. Sui, F. Du and B. Zou, *Nanoscale Horiz.*, 2019, **4**, 1394-1401.
20. D. Qiu, J. Guan, M. Li, C. Kang, J. Wei, Y. Li, Z. Xie, F. Wang and R. Yang, *Adv. Funct. Mater.*, 2019, **29**, 1903496.
21. X. Hu, Y. Liu, J. Chen, L. Yi, H. Zhan and Z. Wen, *Adv. Energy Mater.*, 2019, **9**, 1901533.
22. M. Y. Song, N. R. Kim, S. Y. Cho, H.-J. Jin and Y. S. Yun, *ACS Sustainable Chem. Eng.*, 2017, **5**, 616-624.
23. Z. Le, F. Liu, P. Nie, X. Li, X. Liu, Z. Bian, G. Chen, H. B. Wu and Y. Lu, *ACS Nano*, 2017, **11**, 2952-2960.
24. X. Wang, Q. Li, L. Zhang, Z. Hu, L. Yu, T. Jiang, C. Lu, C. Yan, J. Sun and Z. Liu, *Adv. Mater.*, 2018, **30**, e1800963.
25. Y.-E. Zhu, L. Yang, J. Sheng, Y. Chen, H. Gu, J. Wei and Z. Zhou, *Adv. Energy Mater.*, 2017, **7**, 1701222.
26. S. Liu, Z. Cai, J. Zhou, A. Pan and S. Liang, *J. Mater. Chem. A*, 2016, **4**, 18278-18283.
27. J. Ding, H. Wang, Z. Li, K. Cui, D. Karpuzov, X. Tan, A. Kohandehghan and D. Mitlin, *Energy Environ. Sci.*, 2015, **8**, 941-955.
28. S. Fleischmann, M. Zeiger, A. Quade, A. Kruth and V. Presser, *ACS Appl. Mater. interfaces*, 2018, **10**, 18675-18684.
29. G. Zhu, T. Chen, L. Wang, L. Ma, Y. Hu, R. Chen, Y. Wang, C. Wang, W. Yan, Z. Tie, J. Liu and Z. Jin, *Energy Storage Mater.*, 2018, **14**, 246-252.
30. B. Deng, T. Lei, W. Zhu, L. Xiao and J. Liu, *Adv. Funct. Mater.*, 2018, **28**, 1704330.
31. H. Wang, Y. Zhang, H. Ang, Y. Zhang, H. T. Tan, Y. Zhang, Y. Guo, J. B. Franklin, X. L. Wu, M. Srinivasan, H. J. Fan and Q. Yan, *Adv. Funct. Mater.*, 2016, **26**, 3082-3093.
